# Supplementary material for: Transglutaminase 2 programs differentiating acute promyelocytic leukemia cells in all-trans retinoic acid treatment to inflammatory stage through NF-κB activation
Source: PubMed Central journal article supplement — Haematologica. 2018 Sep 28;104(3):505–15. doi: 10.3324/haematol.2018.192823 (PMC6395331; doi:10.3324/haematol.2018.192823), 2019-03
Supplement: 2018_192823-Disclosures_and_Contributions.pdf [file 2018_192823-Disclosures_and_Contributions.pdf]

Haematologica  
HAEMATOL/2018/192823  
Version 3

Transglutaminase 2 programs differentiating acute promyelocytic leukemia cells in all-trans retinoic acid treatment to inflammatory stage through NF- $\kappa$ B activation

Károly Jambrovics, Iván P. Uray, Zsolt Keressztesy, Jeffrey W. Keillor, László Fésüs, and Zoltán Balajthy

Disclosures: none

Contributions: K.J., Designed, performed experiments, quantified gene expression and wrote the manuscript. I.P.U. Analyzed data and wrote the paper. Zs.K. Designed TALEN and wrote the paper. L. F., Took part in writing of the manuscript. Z. B., Developed the concept and interpretation, designed the study, performed experiments, wrote the manuscript.
